# Supplementary material for: Efficient CRISPR/Cas9-mediated genome modification of the glassy-winged sharpshooter Homalodisca vitripennis (Germar)
Source: PubMed Central journal article supplement (PMC9018754; doi:10.1038/s41598-022-09990-4), 2022-04-19
Supplement: 41598_2022_9990_MOESM1_ESM.pdf [file 41598_2022_9990_MOESM1_ESM.pdf]

a

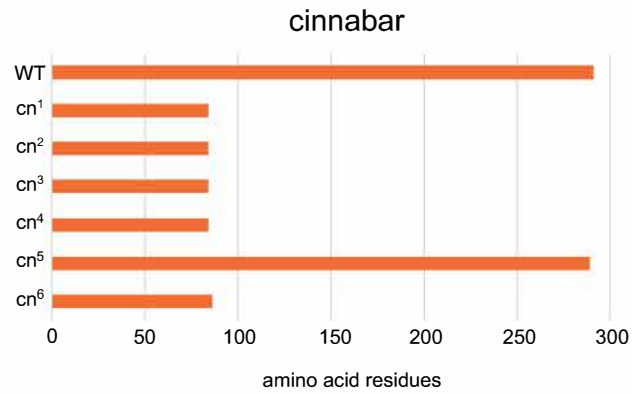

b

### Wild-type *cn* deduced protein (291 residues)

MKRPMFDYNQTYIQHGYMELCIPTTDGQFAMKPNYLHIWPRGSFMMIALPNQDCSWTVLTFMPFSQF**SALD**SPVRL**TM**  
**FT**TFEFGTSLIKKELVHDTYAAAPSRILVSNKCPYVVGSSRAVIGLEAAHAMVITYQCKMAGPEKQLLDRILITESGM  
**DLQ**TALQFSSFSRSPQAHATGDLAMYNVEMRDLVTRQSFLWRKRLDN**LLYWMFELWFDYNSVTE**DMRYSHCASNKR  
 WQDKMVS**RLRVACFELCLITVYCSVSWPSLRQ**TLHPHFTSVFLFSPLLS\*

### *cn*<sup>1</sup> deduced protein (84 residues)

MKRPMFDYNQTYIQHGYMELCIPTTDGQFAMKPNYLHIWPRGSFMMIALPNQDCSWTVLTFMPFSQF**SALD**SPVRL**LLP**  
 HPLP\*

### *cn*<sup>2</sup> deduced protein (84 residues)

MKRPMFDYNQTYIQHGYMELCIPTTDGQFAMKPNYLHIWPRGSFMMIALPNQDCSWTVLTFMPFSQF**SALD**SPV**RLQLP**  
 HPLP\*

### *cn*<sup>3</sup> deduced protein (84 residues)

MKRPMFDYNQTYIQHGYMELCIPTTDGQFAMKPNYLHIWPRGSFMMIALPNQDCSWTVLTFMPFSQF**SALD**SPV**RQVI**P  
 HPLP\*

### *cn*<sup>4</sup> deduced protein (84 residues)

MKRPMFDYNQTYIQHGYMELCIPTTDGQFAMKPNYLHIWPRGSFMMIALPNQDCSWTVLTFMPFSQF**SALD**SPV**RLQLL**  
 PHPLP\*

### *cn*<sup>5</sup> deduced protein (289 residues)

M**RE**FDYNQTYIQHGYMELCIPTTDGQFAMKPNYLHIWPRGSFMMIALPNQDCSWTVLTFMPFSQF**SALD**SPV**RLP**  
**TFE**FGTSLIKKELVHDTYAAAPSRILVSNKCPYVVGSSRAVIGLEAAHAMVITYQCKMAGPEKQLLDRILITESGWL  
 QTA**IQ**PS**FP**PPDAHA**IC**DLAMYN**Y**EMRDLVTRQSFLWRKRLDNALYWMFPSLWPLVNSVTFSDMRYSHCASNKRWQDK  
 MVS**RGLR**VACVFLCLITVYCSVSWPSLRQTLHPHFTSVFLFSPLLS\*

### *cn*<sup>6</sup> deduced protein (86 residues)

MKRPMFDYNQTYIQHGYMELCIPTTDGQFAMKPNYLHIWPRGSFMMIALPNQDCSWTVLTFMPFSQF**SALD**SP**STPT**S  
 LTPSVS\*

c

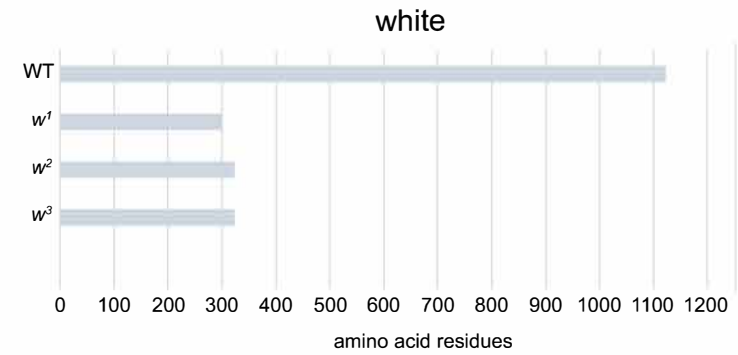

d

### Wild-type *w* protein (1161 aa)

MLIREVANKVIEMPCAQNHRNGSQKELSNGLYLELSDTEKKPQVNGYSSGGSGSPYSTVSVILPKENITYTWSNVNVFT  
 RLEHRQNRVNVLVHNVVHRDRPQQRKHILKNVTGVAY**PGELMALMGSSGAGKTTLLNSLTFRAPKTLAVTGHR**AINGVPV  
**DANALAA**L**SAYVQ**DDLF**IGTLTVREHLIFQALVRMDRHI**PYVQRMIRVEEVINDLMLTRCQD**TVIGVPGKIKIGISGGEM**  
**KRLSF**ASEVLTNPPLMFCDEPTSGLDSFMAQNVVTVLKS**LAEK**GT**IVCTIHQPSSEVFSMPD**KILLMAEGRVAF**LGTPS**  
 EADIDFFKTSVLLLSMYSMKNTNKYPCGKCLANVSKCAVLCKGSCNQWLHLKCTDLSKEDYERIKKSI**IKKWLCSNC**  
 ELADIDEEIEVEDRVLYVELKEELESQELIKNLS**EDLAKANDEIKNVSTYTLNLETLVLKEESIELLERKVKIESENK**  
 SECKCLNKYKATGPRRSLPAKLSTPVSSIMNKNRDLSEKNKELPYTVVKNRQKHATNII**FQNKDLNFISK**NQYEVLSV  
 EEEEEENGPKQPVQTSREKKKLLICADSHGRDLAWNLNQ**TQHTYEAVGFVRPGGRTGQVLDNHNIEEELGEEDGLVI**  
 LCGTNDVA**INNAQDAIKNIELV**LNKITSTVSKIVVVDIPRRYDLVEWSCVNVQEVKKTNCALKEMCNKFRD**VSLVEVSRAE**  
 RHLHTRHGMLNRRGKMWLAHQIARVLD**SKQE**TYNVSP**TLRTGSEESVADAMMTEISTPTTEDSTSSGNSPLQ**PT  
 HNRMGAVCP**SHYN**PADFFIQLLAVPVNAEESCRNMIEMVCSFATSEIGSKI**SMLAEVGGGT**KVKS**AWN**WSDPFNSVSM  
 YKASWCA**Q**FR**AVFWRS**WLSVNKEPVL**IKVRI**LQTL**VM**SLMVGIIY**FGQDYDQGV**MNIN**GA**L**PICIS**N**MTQ**N**VF**AVITV  
**FCSEMP**VFMREHYNGMYRTDVY**FLCKTLAEVPI**FLV**IPV**L**FTC**IMY**Y**MVGLNPDSR**RFQ**SI**VI**ITL**VNSVAT**SFGY**FIS**  
**SVSSSIA**VALSIG**PPII**IP**FL**L**FG**FP**LV**GV**PPY**FKWLS**HL**SW**FKY**NE**ALLIN**W**DN**KI**DI**ACTRSNT**TC**PSDGHV  
 LEQNF**SERN**Y**W**DI**W**L**V**LI**IG**FR**V**AF**L**LI**LR**TSRRR\*

### *w*<sup>1</sup> deduced protein (299 residues)

MLIREVANKVIEMPCAQNHRNGSQKELSNGLYLELSDTEKKPQVNGYSSGGSGSPYSTVSVILPKENITYTWSNVNVFT  
 RLEHRQNRVNVLVHNVVHRDRPQQRKHILKNVTGVAY**PGELMALMGSSGAGKTTLLNSLTFRAPKTLAVTGHR**AINGVPV  
**DANALAA**L**SAYVQ**DDLF**IGTLTVREHLIFQALVRMDRHI**PYVQRMIRVEEVINDLMLTRCQD**TVIGVPGKIKIGISGGEM**  
**KRLSF**ASEVLTNPPLMFCDEPTSGLDSFMAQNVVTVLKS**LAEK**GT**IVCTIHQPS**SV**CI**\*

### *w*<sup>2</sup> deduced protein (323 residues)

MLIREVANKVIEMPCAQNHRNGSQKELSNGLYLELSDTEKKPQVNGYSSGGSGSPYSTVSVILPKENITYTWSNVNVFT  
 RLEHRQNRVNVLVHNVVHRDRPQQRKHILKNVTGVAY**PGELMALMGSSGAGKTTLLNSLTFRAPKTLAVTGHR**AINGVPV  
**DANALAA**L**SAYVQ**DDLF**IGTLTVREHLIFQALVRMDRHI**PYVQRMIRVEEVINDLMLTRCQD**TVIGVPGKIKIGISGGEM**  
**KRLSF**ASEVLTNPPLMFCDEPTSGLDSFMAQNVVTVLKS**LAEK**GT**IVCTI**CA**PK**TIGILHVRQDLA**HGRG**SCGI**PWNSI**  
 RSH\*

### *w*<sup>3</sup> deduced protein (324 residues)

MLIREVANKVIEMPCAQNHRNGSQKELSNGLYLELSDTEKKPQVNGYSSGGSGSPYSTVSVILPKENITYTWSNVNVFT  
 RLEHRQNRVNVLVHNVVHRDRPQQRKHILKNVTGVAY**PGELMALMGSSGAGKTTLLNSLTFRAPKTLAVTGHR**AINGVPV  
**DANALAA**L**SAYVQ**DDLF**IGTLTVREHLIFQALVRMDRHI**PYVQRMIRVEEVINDLMLTRCQD**TVIGVPGKIKIGISGGEM**  
**KRLSF**ASEVLTNPPLMFCDEPTSGLDSFMAQNVVTVLKS**LAEK**GT**IVCTIHQPS**VISILHVRQDLA**HGRG**SCGI**PWNSI**  
 IRSH\*

■ FAD-binding domain ■ Transmembrane domain ■ ATPase domain ■ ABC domain
