# Supplementary material for: Efficient CRISPR/Cas9-mediated genome modification of the glassy-winged sharpshooter Homalodisca vitripennis (Germar)
Source: PubMed Central journal article supplement (PMC9018754; doi:10.1038/s41598-022-09990-4), 2022-04-19

Supplementary Figure S4

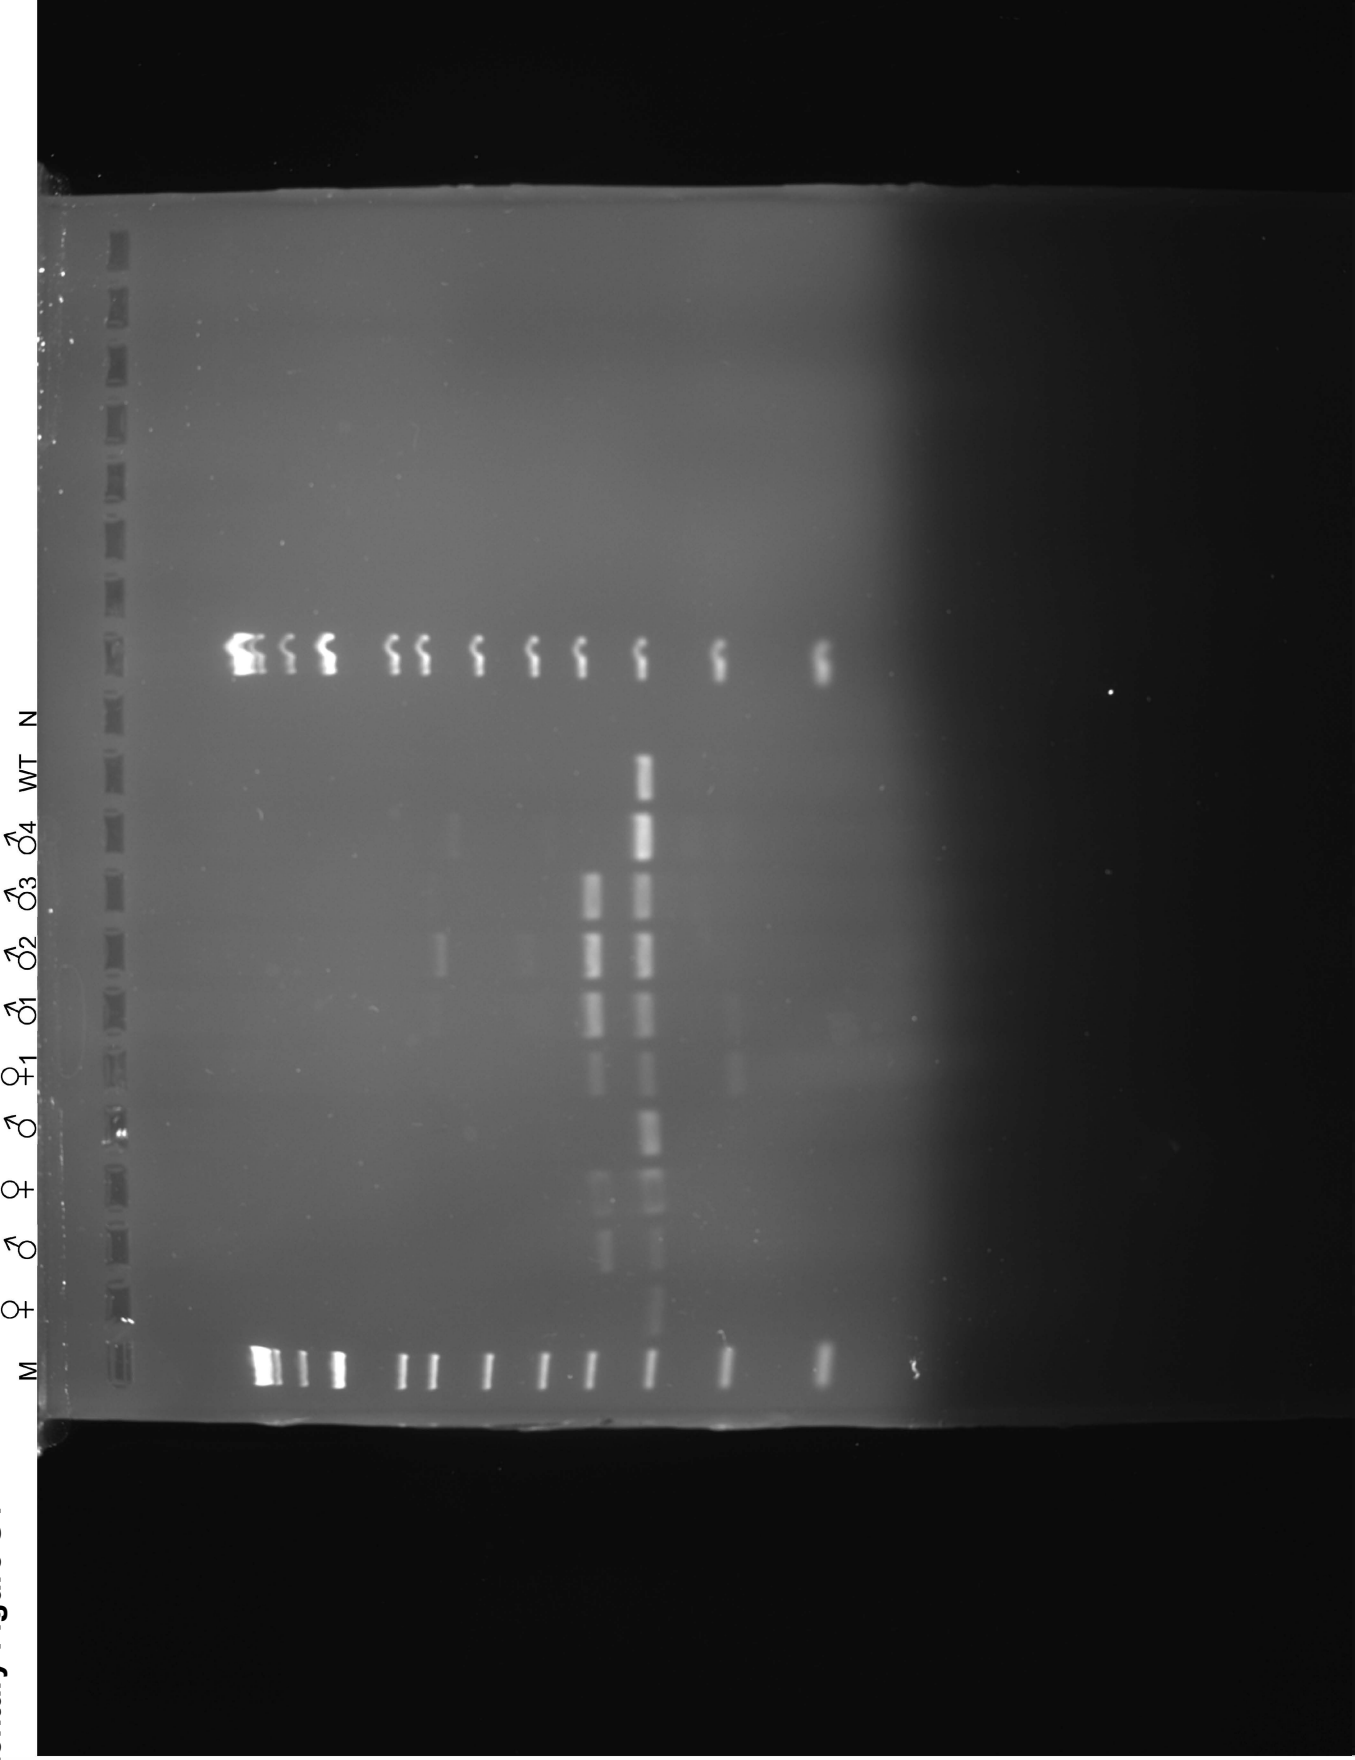

Supplement: 41598_2022_9990_MOESM4_ESM.pdf [file 41598_2022_9990_MOESM4_ESM.pdf]
